# Supplementary material for: Prevalence and Predictors of Overweight and Obesity among Military Personnel with Low Socio-Economic Status in Kuala Lumpur
Source: Research Square preprint supplement (doi:10.21203/rs.3.rs-697263/v1), 2021-07-14
Supplement: Supplementary file 1 [file 8d08f6b9fcb4c36b49b7ac4b.docx]

**Table II. Associated factors of overweight and obesity among the army personnel with low socioeconomic status in Kuala Lumpur**

|  | **Chi Square Test** | | | **Simple Logistic Regression** | | | |
| --- | --- | --- | --- | --- | --- | --- | --- |
|  | **2** | **d*f*** | **p-value** | **Crude OR** | **95% CI** | | **p-value** |
|  |  |  |  |  | **Lower** | **Upper** |  |
| **Age group (years)** | 44.529 | 3 | <0.001 |  |  |  | <0.001 |
| 20-24 |  |  |  | 1.000 |  |  |  |
| 25-29 |  |  |  | 0.156 | 0.082 | 0.298 | <0.001 |
| 30-34 |  |  |  | 0.503 | 0.329 | 0.768 | 0.001 |
| 35-39 |  |  |  | 0.825 | 0.545 | 1.247 | 0.825 |
| **Marital Status** | 48.601 | 2 | <0.001 |  |  |  | <0.001 |
| Single |  |  |  | 1.000 |  |  |  |
| Married |  |  |  | 3.346 | 2.346 | 4.774 | <0.001 |
| Divorcee/Widow |  |  |  | 3.878 | 01.496 | 10.056 | 0.005 |
| **Rank** | 53.829 | 3 | <0.001 |  |  |  | <0.001 |
| Private (PBT) |  |  |  | 1.000 |  |  |  |
| Lance Corporal (LKPL) |  |  |  | 2.940 | 1.673 | 5.166 | <0.001 |
| Corporal (KPL) |  |  |  | 4.719 | 2.922 | 7.620 | <0.001 |
| Sergeant (SGT) |  |  |  | 6.323 | 3.469 | 11.527 | <0.001 |
| **Level of Education** | 12.814 | 2 | 0.002 |  |  |  | 0.003 |
| Tertiary Education |  |  |  | 1.000 |  |  |  |
| Post-secondary Education |  |  |  | 2.186 | 0.975 | 4.899 | 0.058 |
| Secondary Education |  |  |  | 3.015 | 1.570 | 5.792 | 0.001 |
| **Years of Service** | 46.921 | 2 | <0.001 |  |  |  | <0.001 |
| Less than 5 years |  |  |  | 1.000 |  |  |  |
| 5 to 15 years |  |  |  | 3.286 | 2.122 | 5.087 | <0.001 |
| More than 15 years |  |  |  | 5.574 | 3.312 | 9.380 | <0.001 |
| **Current Health Status (PULHEEMS)** | 8.061 | 3 | 0.045 |  |  |  | 0.085 |
| Status Nil (PES NIL) |  |  |  | 1.000 |  |  |  |
| Fit Everywhere (FE) |  |  |  | 1.124 | 0.404 | 3.126 | 0.823 |
| Line of Communication Everywhere (LE) |  |  |  | 6.667 | 1.047 | 42.431 | 0.045 |
| Base Everywhere (BE) |  |  |  | 2.143 | 0.521 | 8.814 | 0.291 |
| **Past Medical Illness** | 7.095 | 1 | 0.008 |  |  |  |  |
| No |  |  |  | 1.000 |  |  |  |
| Yes |  |  |  | 2.349 | 1.233 | 4.476 | 0.009 |
| **Past Injury** | 9.383 | 1 | 0.002 |  |  |  |  |
| No |  |  |  | 1.000 |  |  |  |
| Yes |  |  |  | 1.903 | 1.255 | 2.886 | 0.002 |
| **Family History of Obesity** | 33.144 | 1 | <0.001 |  |  |  | <0.001 |
| No family history |  |  |  | 1.000 |  |  |  |
| Sibling |  |  |  | 1.918 | 1.163 | 3.162 | 0.011 |
| Parent |  |  |  | 1.880 | 1.880 | 5.034 | <0.001 |
| Grandparent |  |  |  | 1.694 | 1.694 | 36.934 | 0.009 |
| **Knowledge on Dietary Intake** | 8.707 | 1 | 0.003 |  |  |  |  |
| Good |  |  |  | 1.000 |  |  |  |
| Poor |  |  |  | 1.604 | 1.171 | 2.198 | 0.003 |
| **Plain Water Intake (daily)** | 6.145 | 1 | 0.013 |  |  |  |  |
| More than 2 litres |  |  |  | 1.000 |  |  |  |
| Less than 2 litres |  |  |  | 1.439 | 1.079 | 1.921 | 0.013 |
